# Supplementary material
Source: Research Square preprint supplement (doi:10.21203/rs.3.rs-9522658/v1)
Supplement: Supplementary file 1 [file 7f73fc884f0c706e0adac81b.docx]

**KNOWLEDGE, ATTITUDES, AND PRACTICES OF HEALTHCARE PROFESSIONALS ON FEMALE GENITAL SCHISTOSOMIASIS IN THE MABALAKO HEALTH ZONE, DEMOCRATIC REPUBLIC OF THE CONGO**

**Start time:**

**I. IDENTITY OF THE INVESTIGATION**

| **ITEMS** | **LABELLES** | **RESPONSE METHODS** |
| --- | --- | --- |
| Q00 | Questionnaire number |  |
| Q01 | Registration date |  |
| Q02 | Name of the respondent's home health area | 1. **MANGINA** 2. **MASIMBEMBE** 3. **LINZO** 4. **MANGODOMU** 5. **BINGO** 6. **BUHUMBANI** 7. **MALESE** 8. **METAL** 9. **VISIKI** 10. **ALOYA** 11. **NGOYO** 12. **MUNUNZE** 13. **VUSAYIRO** 14. **LUBENA** 15. **NGAZI** 16. **MABALAKO** . 17. **Other things to specify** |
| Q03 | Respondent's date of birth |  |
| Q04 | Respondent's age (calculate age) |  |
| Q05 | Respondent's gender | 1. Masculin  2. Feminine |
| Q06 | Civil status of the respondent | 1. Single  2. Married  3. Divorced  4. Widower​ |
| Q07 | Level of education | 1. State-certified diploma (A2)  2. Graduate (A1)  3. Licensed (A0)  4. Doctor of Medicine  5. Specialist |
| Q08 | Occupation | 1. Doctor  2. Nurse  3. Laboratory Technician |
| Q09 | Religion | 1. Catholic  2. Protestant  3. Muslim woman  4. Revival Church  5. Jehovah's Witness  6. None |

**II. KNOWLEDGE ABOUT FEMALE GENITAL SCHISTOSOMIASIS**

| **ITEMS** | **LABELLES** | **RESPONSE METHODS** |
| --- | --- | --- |
| Q10 | Have you ever heard of female genital schistosomiasis? | 1. Yes  2. No |
| Q11 | If so, through which channel?  **If Q10=2, move on to Q12** | 1. Television  2. Radio  3. Church  4. School  5. Newspapers  6. Community relays  7. For having been a victim of the disease  8. Others to be specified |
| Q11b | Other details to be specified |  |
| Q12 | Which of the following parasites is known to cause female genital schistosomiasis? | 1. Schistosoma mansoni  2. Schistosoma haematobium  3. Schistosoma japonicum  4. Schistosoma intercalatum  5. Schistosoma Mekongi  6. Other details to be specified |
| Q12b | Other things to specify |  |
| Q13 | Are you familiar with the signs that appear in a patient suffering from this disease?  **If Q13=9, proceed to Q13b** | 1. Abdominal pain  2. Urinary pain  3. Blood in the urine  4. Presence of blood in the stool  5. Pain during sexual intercourse  6. Pain during urination  7. Vaginal bleeding during intercourse  8. Menstrual cycle disruption  9. Other |
| Q13b | Other details to be specified |  |
| Q14 | What tests can be performed to diagnose female genital schistosomiasis?  **If Q14=9, proceed to Q14b** | 1. Stool examinations  2. Urine Tests  3. Blood tests  4. X-ray  5. Scanner  6. Pathological Anatomy  7. Molecular analyses  8. Colposcopy  9. Other |
| Q14b | Other details to be specified |  |
| Q15 | How do you think one catches this disease?  **If Q15=7, proceed to Q15b** | 1. By drinking unsafe water  2. By eating certain foods  3. When washing or doing laundry in the river  4. By contagion  5. Walking barefoot in the urine of a sick person  6. I don't know  7. Others to be specified |
| Q15b | Other details to be specified |  |
| Q16 | Are you familiar with the lesions observed during colposcopy in cases of female genital schistosomiasis?  **If Q16=2, move on to Q17** | 1. Yes  2. No |
| Q16a | If so, which ones?  **If Q16a=6, move on to Q16b** | 1. Sandy mat-like lesions  2. Papular lesions,  3. yellowish spots,  4. neo-vessels,  5. Cervical bleeding upon contact  6. Other details to be specified |
| Q16b | Other details to be specified |  |
| Q17 | Do you know of any ways to prevent this disease?  **If Q17=2, move on to Q19** | 1. Yes  2. No |
| Q18 | If so, which ones? | 1. Do not drink unsafe water  2. Do not wash in the river  3. Do not walk barefoot  4. Do not do laundry in the river  5. Other details to be specified |
| Q18b | Other details to be specified |  |

**III. PRACTICES**

| Q19 | Have you ever received a patient suffering from this disease at your affiliated facility?  **If Q19=2, move on to Q21** | 1. Yes  2. No |
| --- | --- | --- |
| Q20 | If so, what treatment had he been subjected to? | 1. Vermox  2. Zentel  3. Praziquantel  4. Surgery  5. Other details to be specified |
| Q21 | Do you have access to water sources in your neighborhood?  **If Q21=2, move on to Q23** | 1. Yes  2. No |
| Q22 | If so, can you estimate the time from your household's water supply location to the water source? | 1. Less than 10 minutes  2. 10-30 minutes  3. 30-60 minutes  4. 60-90 minutes  5. More than 90 minutes |
| Q23 | Do you have a toilet for your household?  **If Q23=1, move on to Q25** | 1. Yes  2. No |
| Q24 | If not, where do you relieve yourself? | 1. Behind the house  2. In the bush  3. In the river  4. Other |

**IV. ATTITUDES**

| Q25 | Do you ever go to rivers? | 1. Yes  2. No |
| --- | --- | --- |
| Q26 | If so, what activities lead you to frequent rivers? | 1. Swimming  2. Laundry detergents  3. Fishing  4. Bring the animals to drink  5. Draw household water  6. Other details to be specified |
| Q26b | Other details to be specified |  |
| Q27 | During these activities, do you sometimes urinate or defecate in the water or at the river's edge?  **If Q28=2, move on to Q29** | 1. Yes  2. No |
| Q28 | If so, why?  **If Q28=4, proceed to Q28b** | 1. Due to lack of toilets  2. Not wanting to go to the toilet  3. Unhygienic toilets  4. Other (please specify) |
| Q28b | Other |  |
| Q29 | Are you willing to participate in actions to combat female genital schistosomiasis in the health area and its surroundings?  **If Q29=1, move on to Q30** | 1. Yes  2. No |
| Q30 | If so, what actions will you take?  **If Q30=4, proceed to Q30b** | 1. Financial contribution?  2. Participation in the cleaning ( salogo ) of riverbanks and their maintenance, avoiding the deposit of household waste and other polluting waste.  3. Urinating and defecating on riverbanks is prohibited.  4. Other details to be specified |
| Q30b | Other details to be specified |  |

Geolocation:

Thank you for participating in our survey!

End time:
